# Supplementary material for: Development of a qPCR Method to Measure Mitochondrial and Genomic DNA Damage with Application to Chemotherapy-Induced DNA Damage and Cryopreserved Cells
Source: Biology (Basel). 2016 Oct 8;5(4):39. doi: 10.3390/biology5040039 (PMC5192419; doi:10.3390/biology5040039)
Supplement: Supplementary file 1 [file biology-05-00039-s001.xlsx]

## Sheet: Sheet1
Excel calculator for DNA damage
measurement by qPCR
						ENTER
						VARIABLES				These are the averages from biological replicates (n≥5)
	Efficiency long product				El	2				These numbers are computed automatically from replicates using
	Efficiency short product				Es	2				comparative quant feature in Rotogene software or can
	Crossover threshold Long (from comparitive quantitation)				CpL	22				be calcuated from your replicates and mean values entered here.
	Crossover threshold Short (from comparitive quantitation)				Cps	12				Enter values in yellow boxes (mock data shown)
	Basepairs long product				a	3454
	Reference/baseline/untreated (CpL 1)				Long	13
	Reference/baseline/untreated (Cps1)				Short	13
			DNA lesions per 10kB =			20.0881
			DNA lesions per 1kB =			2.00881
